# Supplementary material
Source: Springer Nature journal article supplement (https://www.springermedizin.de/resource/supplementary/12916_2012_765_MOESM5_ESM.pdf/9598702)

**A**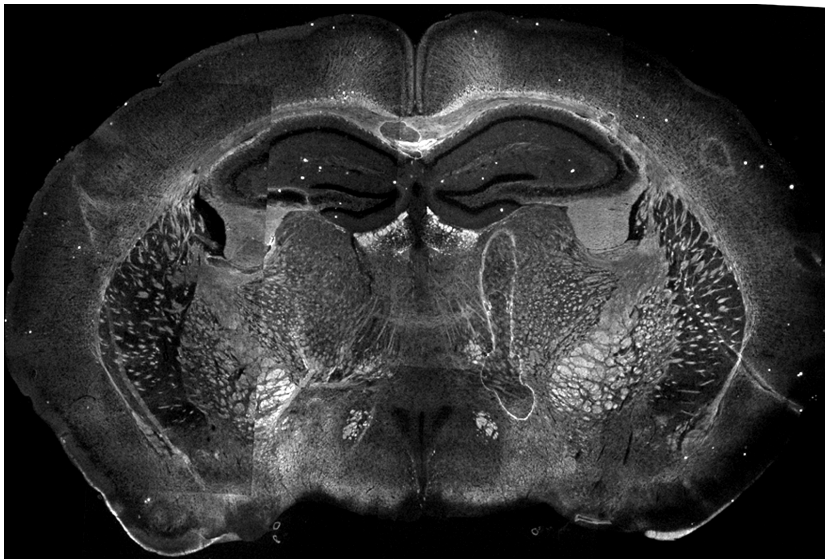**B**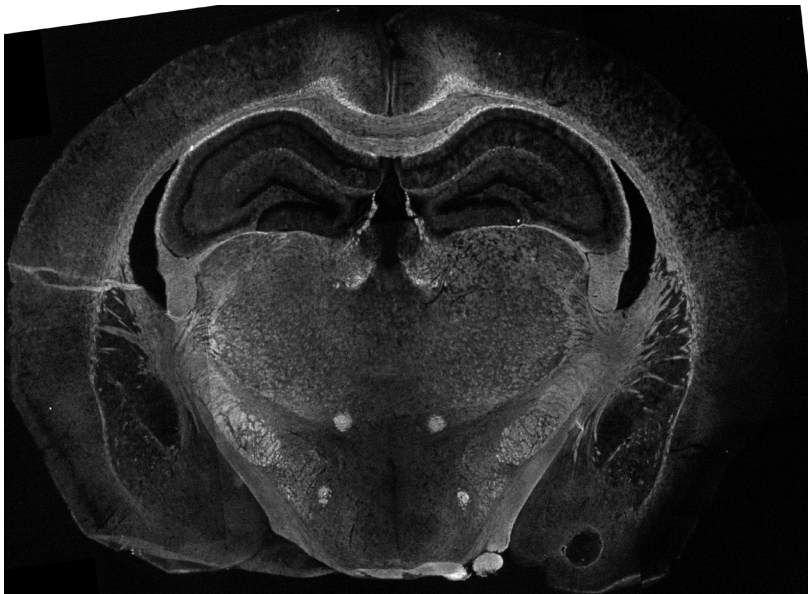**E**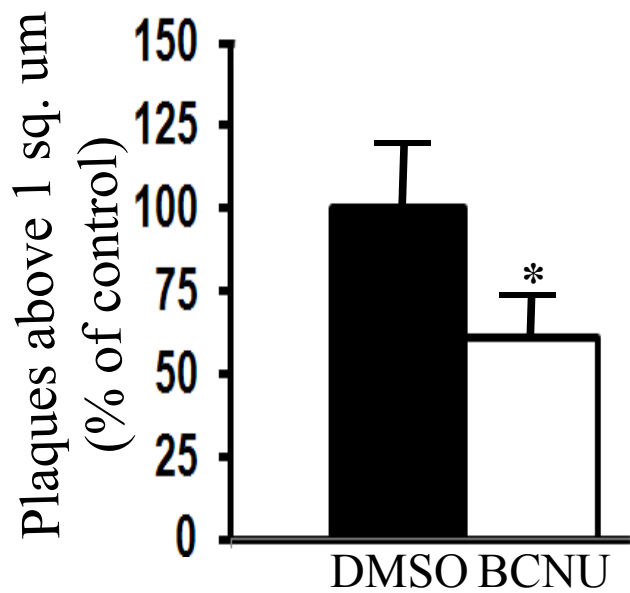**C**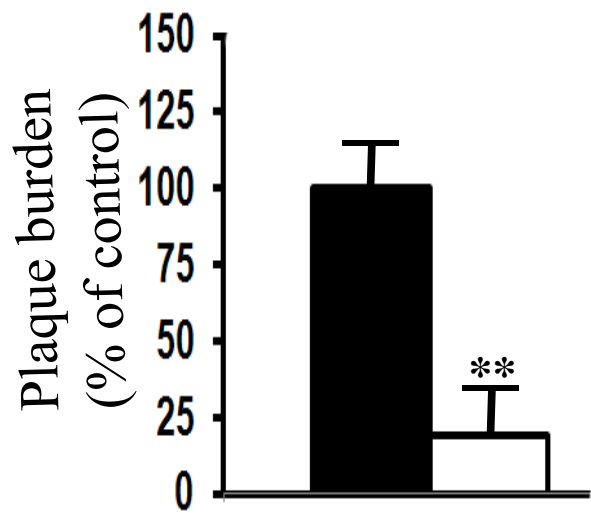**D**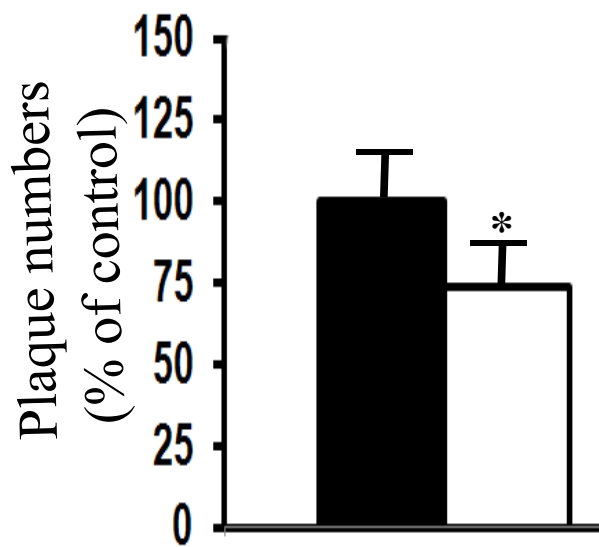**F**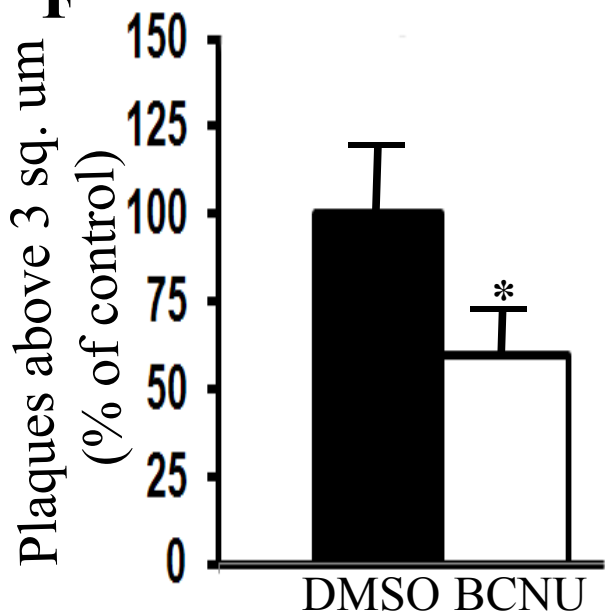

Supplement: MOESM5 [file 9598702]
